# Supplementary material for: The Effect of Mace Training on Strength, Mobility, and Stability in Elite Wrestlers: A Randomized Controlled Trial
Source: Research Square preprint supplement (doi:10.21203/rs.3.rs-6168100/v1), 2025-03-13
Supplement: Supplementary file 1 [file 47413f608c98e358cc0f4055.docx]

**Table 1.** Demographic Characteristics of the Elite Wrestlers

|  | **Mace Training Group** | **Control Group** | **p** | **ES (d)** |
| --- | --- | --- | --- | --- |
| **Age (years)** | 24.67 ± 5.93 | 23.07 ± 2.98 | 0.352 | 0.34(SES) |
| **Height (cm)** | 175.67 ± 7.77 | 174.60 ± 5.89 | 0.689 | 0.16 (TES) |
| **Weight (kg)** | 83.58 ± 14.00 | 80.73 ± 8.66 | 0.451 | 0.24 (SES) |
| **Training Experience (years)** | 12.00 ± 4.55 | 11.13 ± 3.04 | 0.617 | 0.22 (SES) |

*Note: Data are presented as mean ± standard deviation. ES: Effect size; (Effect sizes (d) were calculated using Cohen’s d formula and classified according to Hopkins’ criteria), SES: Small Effect Size; TES: Trivial Effect Size.*

**Table 2.** HandGrip Strength (HGS) and Shoulder Mobility Performance Scores of Wrestlers

|  | **Mace Training Group** | | **Control Group** | | **ES ()** |
| --- | --- | --- | --- | --- | --- |
| **Pre** | **Post** | **Pre** | **Post** |
| **HGS(D)** | 56.56 ± 8.24 | 59.31 ± 7.73 | 56.50 ± 7.16 | 56.97 ± 7.02 | 0.528* |
| **HGS(ND)** | 54.42 ± 7.67 | 56.93 ± 7.14 | 54.74 ± 7.46 | 54.94 ± 6.44 | 0.340* |
| **Shoulder Mobility(D)** | 9.21 ± 9.19 | 6.29 ± 7.81 | 5.47 ± 3.72 | 5.17 ± 2.93 | 0.406* |
| **Shoulder Mobility(ND)** | 11.23 ± 8.71 | 8.08 ± 7.36 | 10.03 ± 4.29 | 6.43 ± 3.93 | 0.019 |

*Note: Data are presented as mean ± standard deviation. * : There is significant interaction between group*time (p<0,05); HGS(D): Dominant Hand Grip Strength; HGS(ND): Non-Dominant Hand Grip Strength; Shoulder Mobility(D): Dominant Shoulder External Rotator Mobility; Shoulder Mobility(ND) :Non-dominant Shoulder Internal Rotator Mobility; ES: Effect size; : Partial eta squared*

**Table 3.** HandGrip Strength (HGS) and Shoulder Mobility Performance Scores of Wrestlers

|  | **Mace Training Group** | | **Control Group** | | **ES ()** |
| --- | --- | --- | --- | --- | --- |
| **Pre** | **Post** | **Pre** | **Post** |
| **CKCUEST (rep. num)** | 25.83 ± 2.59 | 25.92 ± 2.39 | 25.80 ± 1.74 | 23.80 ± 1.66 | 0.660* |
| **IRS (D)** | 32.39 ± 4.97 | 34.99 ± 5.31 | 29.51 ± 3.25 | 29.93 ± 2.61 | 0.568* |
| **IRS (ND)** | 30.98 ± 4.50 | 33.13 ± 5.08 | 27.87 ± 3.18 | 28.09 ± 2.48 | 0.328* |
| **ERS (D)** | 24.20 ± 2.15 | 24.94 ± 2.33 | 22.10 ± 1.62 | 22.26 ± 1.37 | 0.260* |
| **ERS (ND)** | 22.91 ± 2.12 | 23.74 ± 2.36 | 21.11 ± 1.33 | 21.04 ± 1.17 | 0.368* |
| **Push-up (rep. num)** | 43.00 ± 5.22 | 43.17 ± 4.45 | 42.60 ± 5.58 | 39.33 ± 5.11 | 0.395* |

*Note: Data are presented as mean ± standard deviation. * : There is significant interaction between group*time (p<0,05); CKCUEST: Closed Kinetic Chain Upper Extremity Stability Test; rep.num: Repetition number; IRS(D): Dominant internal rotational strength; IRS(ND): Non-dominant internal rotational strength; ERS(D): Dominant external rotational strength; ERS(ND): Non-dominant external rotational strength; ES: Effect size; : Partial eta squared*

**Table 4.** Proprioception scores at 60° and 120° Angles of Elite Wrestlers

|  | **Mace Training Group** | | **Control Group** | | **ES ()** |
| --- | --- | --- | --- | --- | --- |
| **Pre** | **Post** | **Pre** | **Post** |
| Proprioception (60°) D | 3.08 ± 1.15 | 2.86 ± 1.17 | 3.07 ± 0.87 | 3.02 ± 0.62 | 0.014 |
| Proprioception (60°) ND | 3.43 ± 1.09 | 3.66 ± 1.04 | 3.46 ± 0.95 | 3.27 ± 0.86 | 0.071 |
| Proprioception (120°) D | 5.09 ± 1.31 | 5.06 ± 1.37 | 3.95 ± 1.25 | 3.62 ± 1.33 | 0.043 |
| Proprioception (120°) ND | 4.78 ± 1.11 | 4.81 ± 1.19 | 3.86 ± 1.17 | 3.77 ± 1.09 | 0.009 |

*Note: Data are presented as mean ± standard deviation. * : There is significant interaction between group*time (p<0,05); D: Dominant; ND: Non-dominant; ES: Effect size; : Partial eta squared*
